# Supplementary material for: Seasonal Changes in the Microbial Communities on Lettuce (Lactuca sativa L.) in Chungcheong-do, South Korea
Source: PubMed Central journal article supplement (PMC9998205; doi:10.4014/jmb.2210.10001), 2022-12-09
Supplement: jmb-33-2-219-supple.pdf [file jmb-33-2-219-supple.pdf]

**Table S1.** Summary of analyzed metagenome shotgun sequence information.

| Sample       | Season | No. of reads | Avg. length | No. of reads after trim | % Trimmed | Avg. length after trim | No. of features |
|--------------|--------|--------------|-------------|-------------------------|-----------|------------------------|-----------------|
| 0h-4-2_S1    | Summer | 10,829,594   | 246.3       | 10,811,704              | 99.83     | 234.9                  | 210             |
| 6-CJ-R1-2_S2 | Summer | 9,182,086    | 260.7       | 9,175,594               | 99.93     | 242.1                  | 315             |
| 6-CJ-R2-2_S3 | Summer | 8,971,656    | 255.1       | 8,963,927               | 99.91     | 241.1                  | 262             |
| A-0h-2-1_S4  | Summer | 7,964,866    | 245.7       | 7,954,126               | 99.87     | 232.6                  | 295             |
| CJ01-R2_S1   | Winter | 7,981,914    | 260.3       | 7,978,013               | 99.95     | 245                    | 325             |
| CJ01-R6_S2   | Winter | 9,582,472    | 254.7       | 9,576,491               | 99.94     | 243.8                  | 328             |
| CJ02-M13_S3  | Winter | 10,680,326   | 258.2       | 10,675,424              | 99.95     | 244.8                  | 162             |
| CJ02-M14_S4  | Winter | 9,517,026    | 257.7       | 9,511,638               | 99.94     | 247.3                  | 188             |

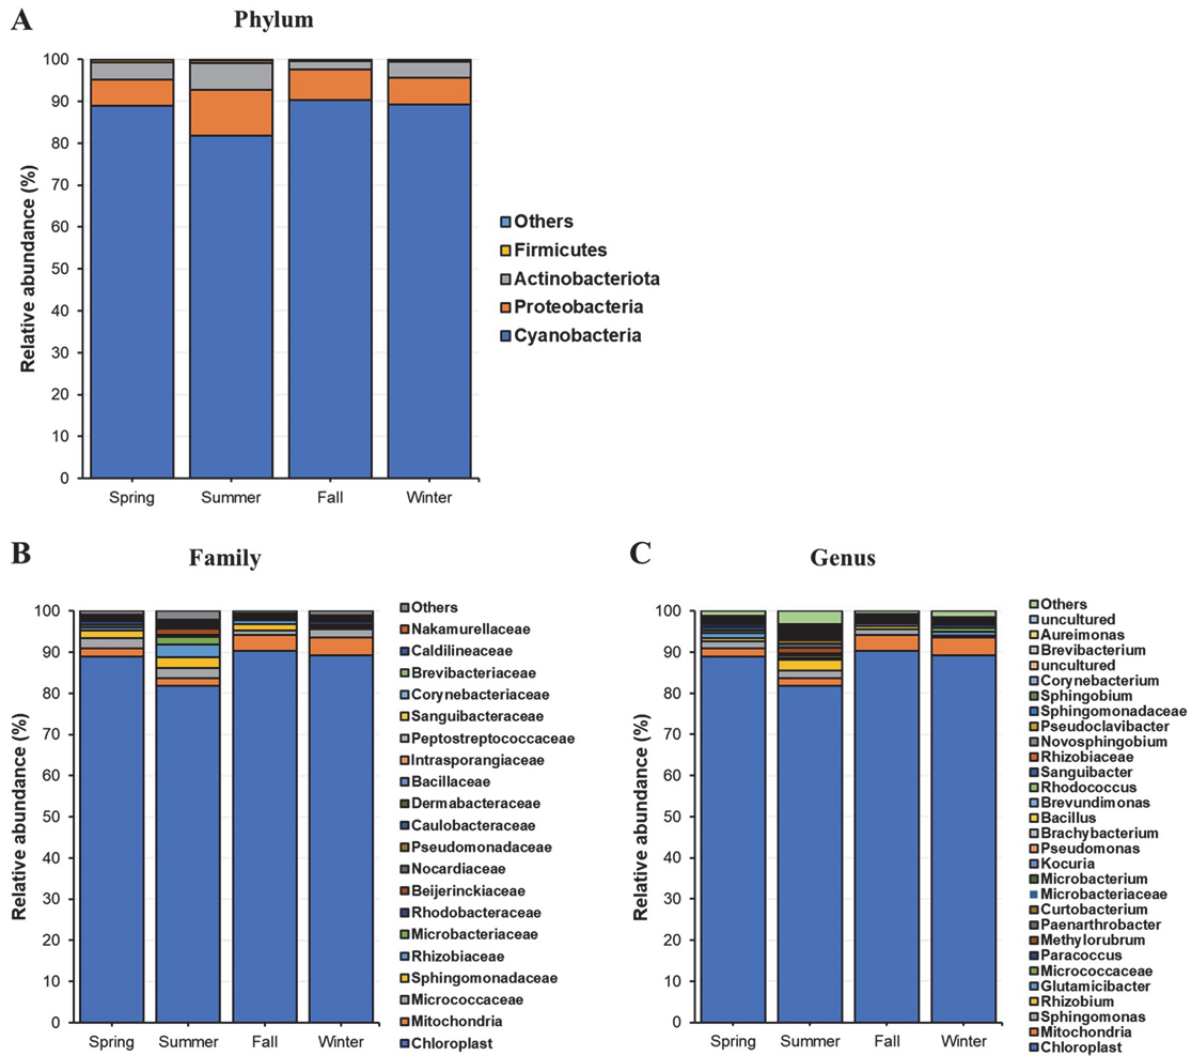

**Fig. S1.** Relative abundance of various bacterial taxa at the **A** phylum, **B** family, and **C** genus levels in the lettuce samples collected during all four seasons.

### A. 16S (all) vs. Shotgun

Summer

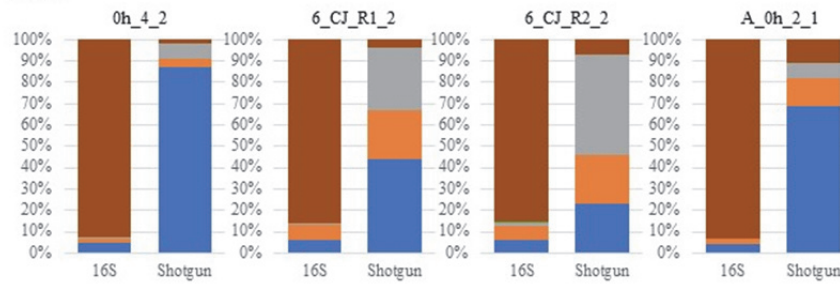

Winter

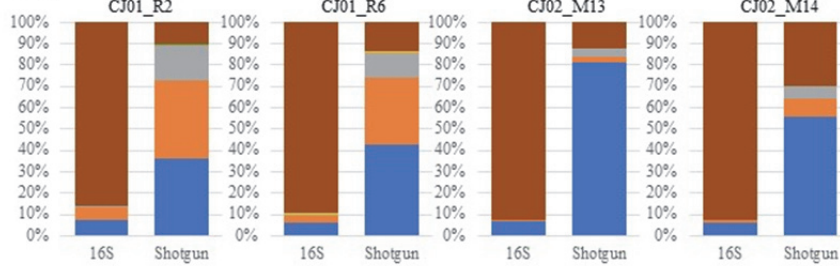

### B. 16S (without Chloroplast, Mitochondria) vs. Shotgun

Summer

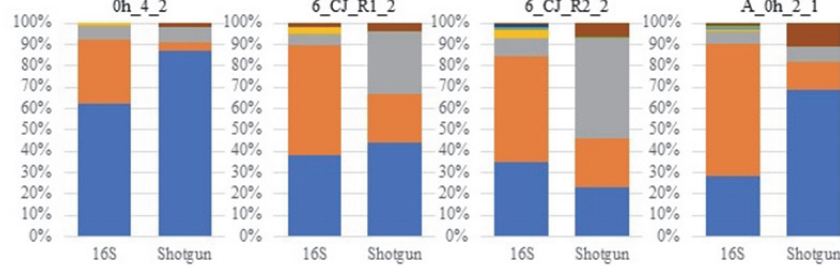

Winter

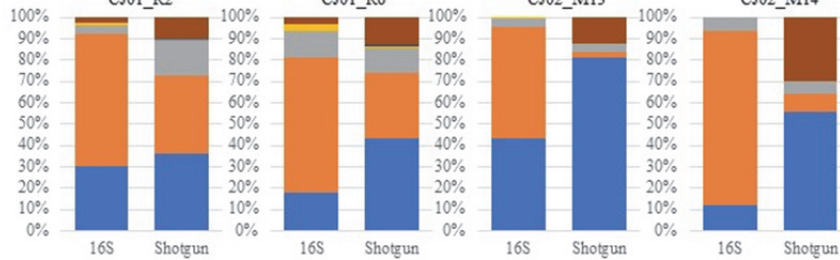

**Fig. S2.** Comparison of bacterial taxa plots for the same sample. (A) 16S rRNA gene-based sequencing (non-filtered) vs. metagenome shotgun sequencing (B) 16S rRNA gene-based sequencing (without chloroplast-related reads) vs. metagenome shotgun sequencing

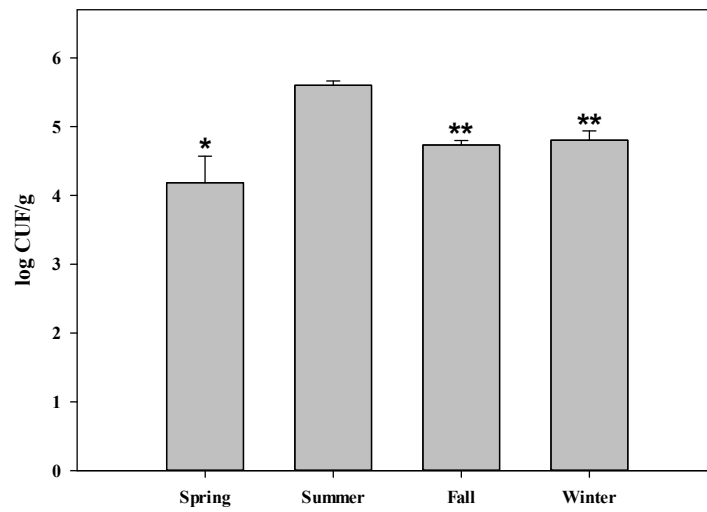

**Fig. S3.** Cell counts of total aerobic bacteria in lettuce at four seasons. The lettuce samples are as follows: Error bars represent the standard error among the three replicates. \*,  $p < 0.05$ ; \*\*,  $p < 0.01$  compared with the lettuce of summer group using the Mann-Whitney U test.

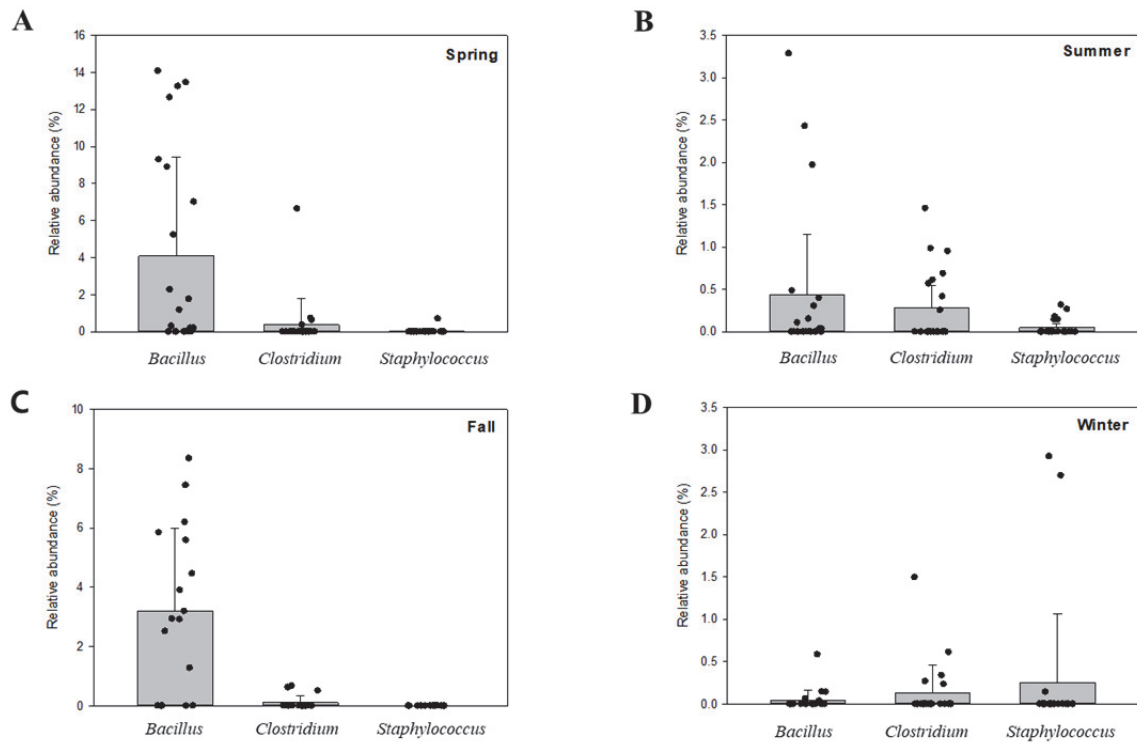

**Fig. S4.** Bacterial monitoring for potential pathogens in the lettuce samples harvested during different seasons. Three genera of potential foodborne pathogens (*Bacillus*, *Clostridium*, and *Staphylococcus*) were monitored in lettuce samples in **A** spring, **B** summer, **C** fall, and **D** winter.

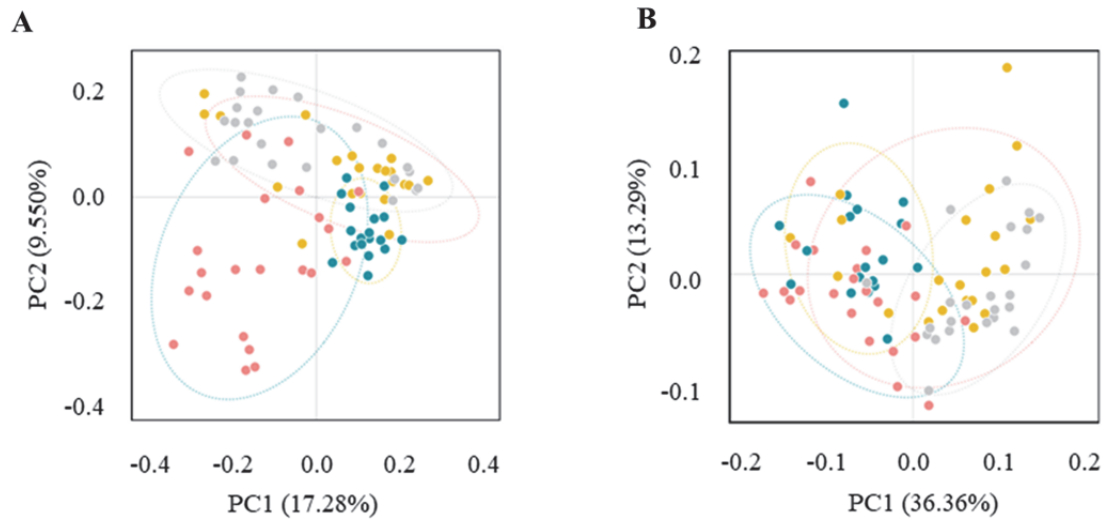

**Fig. S5.** Comparison of microbial beta diversity in the lettuce samples collected from different seasons. Lettuce microbiota composition across four seasons was compared using a PCoA plot based on the unweighted **A** and weighted **B** UniFrac distance.
